# Supplementary material
Source: MDPI journal article supplement (https://www.mdpi.com/2227-9040/11/3/189)
Supplement: s1 [file s1]

# A Facile Surface-Imprinting Strategy for Trypsin-Imprinted Polymeric Chemosensors Using Two-Step Spin-Coating

Je Wook Byeon <sup>1</sup>, Jin Chul Yang <sup>1</sup>, Chae Hwan Cho <sup>2</sup>, Seok Jin Lim <sup>1</sup>, Jong Pil Park <sup>2,\*</sup> and Jinyoung Park <sup>1,\*</sup>

<sup>1</sup> Department of Polymer Science & Engineering, Kyungpook National University, 80 Daehak-ro, Buk-gu, Daegu 41566, Republic of Korea

<sup>2</sup> Basic Research Laboratory, Department of Food Science and Technology, Chung-Ang University, Anseong 17546, Republic of Korea

\* Correspondence: jppark@cau.ac.kr (J.P.P.); jinpark@knu.ac.kr (J.P.); Tel.: +82-31-670-4703 (J.P.P.); +82-53-950-5624 (J.P.)

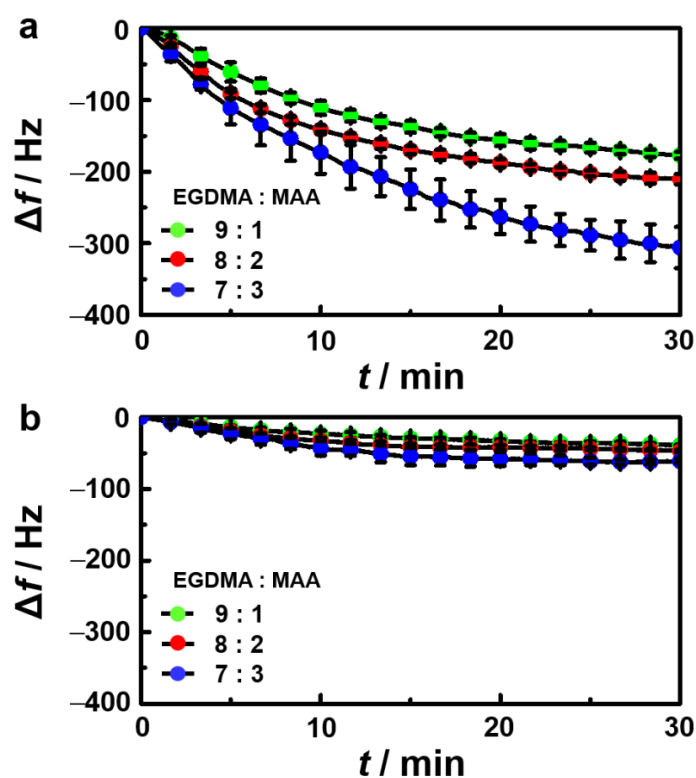

**Figure S1.** Frequency change ( $\Delta f$ ) of (a) MIP and (b) NIP sensors fabricated using different molar ratios of crosslinker and functional monomer, after 30 min of adsorption in a 75 mL PBS (10 mM, pH = 7.4) solution containing 0.24  $\mu\text{g/mL}$  TRY protein ( $n = 3$ ).

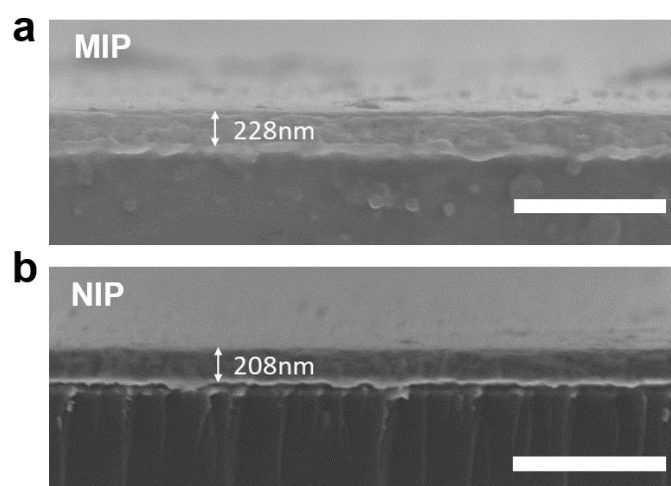

**Figure S2.** Cross-sectional SEM images of (a) MIP and (b) NIP films. All the scale bars are 1 μm.

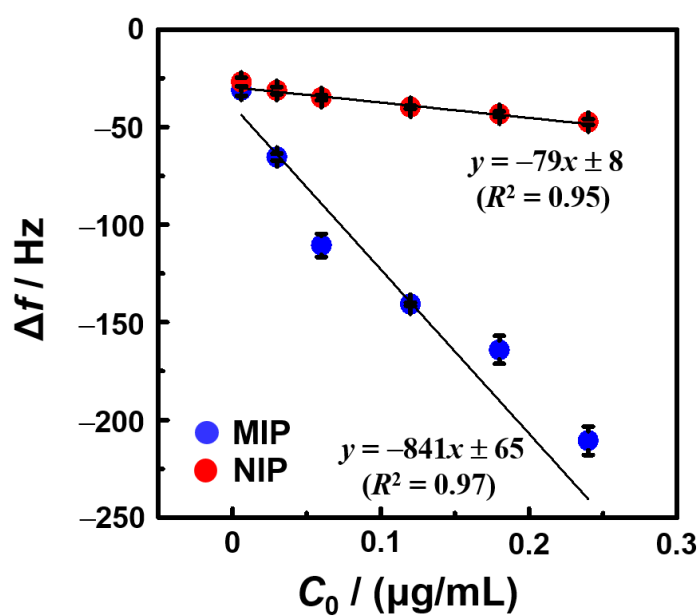

**Figure S3.**  $\Delta f$  values as a function of TRY concentration ( $C_0$ ) for the MIP/NIP film-coated QCM sensors. The measurements were performed individually in a 75 mL PBS (10 mM, pH = 7.4) solution containing TRY concentration ranging from 0.006  $\mu\text{g/mL}$  to 0.240  $\mu\text{g/mL}$ .

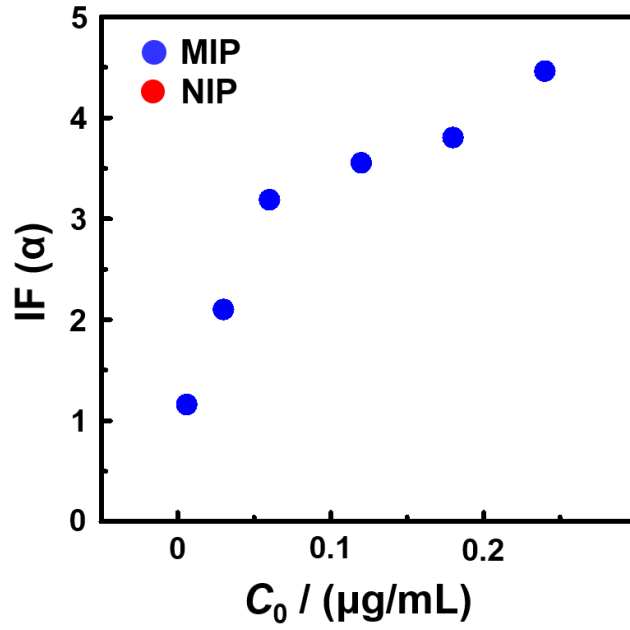

**Figure S4.** Imprinting factor ( $\alpha$ ) as a function of TRY concentration for the MIP/NIP film-coated QCM sensors. The measurements were performed in an individual 75 mL PBS (10 mM, pH = 7.4) solution containing TRY concentration ranging from 0.006  $\mu\text{g/mL}$  to 0.240  $\mu\text{g/mL}$ .

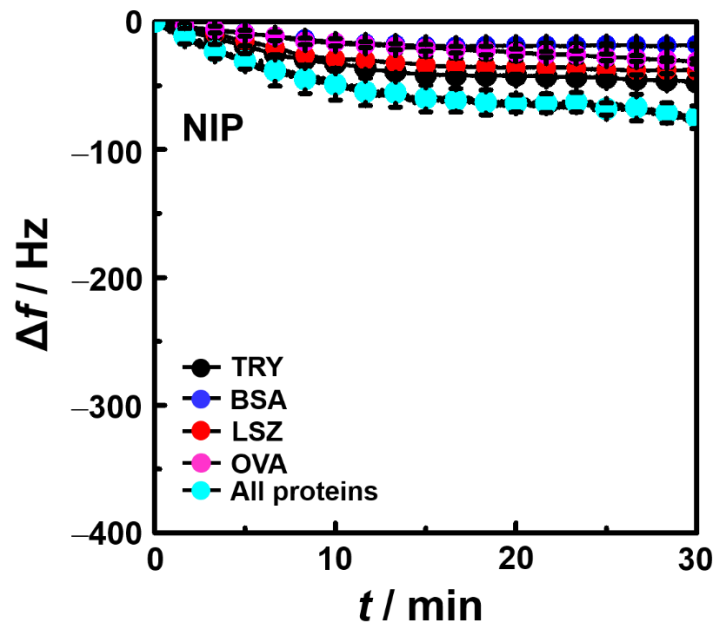

**Figure S5.**  $\Delta f$  as a function of time on the NIP film in a 75 mL PBS (10 mM, pH = 7.4) solution containing individual proteins of 0.24  $\mu\text{g/mL}$  or all proteins (total concentration = 0.96  $\mu\text{g/mL}$ ) during the adsorption.
